# Supplementary material for: Superhydrophobic bull's-eye for surface-enhanced Raman scattering
Source: Royal Society of Chemistry journal article supplement (doi:10.1039/c4lc00477a), 2014-01-01
Supplement: c4lc00477a4.pdf [file c4lc00477a4.pdf]

## Supplementary materials

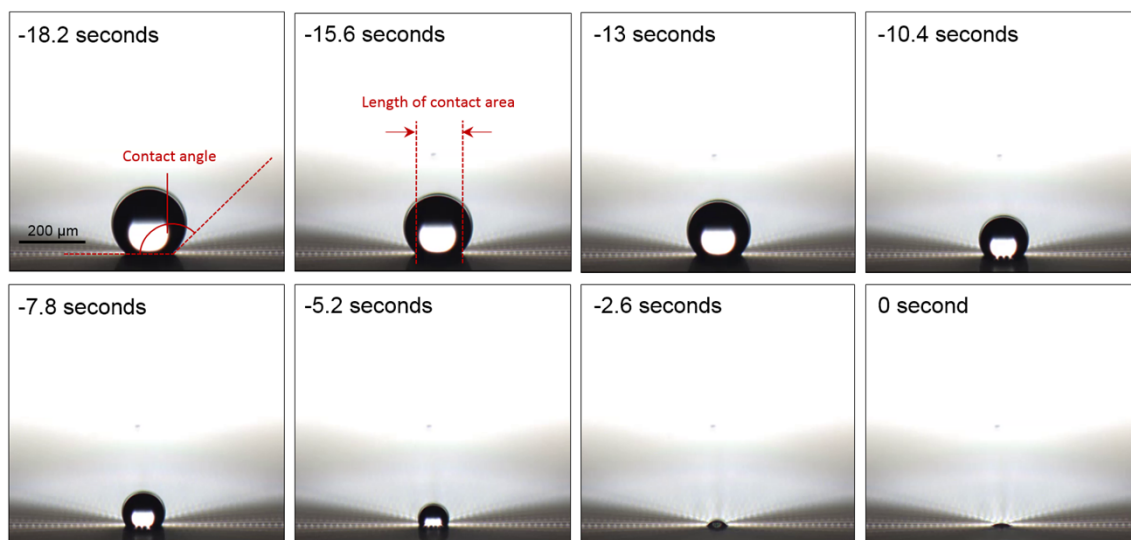

Figure 1: Micrograph of a droplet (side view) as it dries on superhydrophobic bulls-eye substrate. Time scale is chosen such that “0 seconds” represents moment at which droplet evaporation is complete.

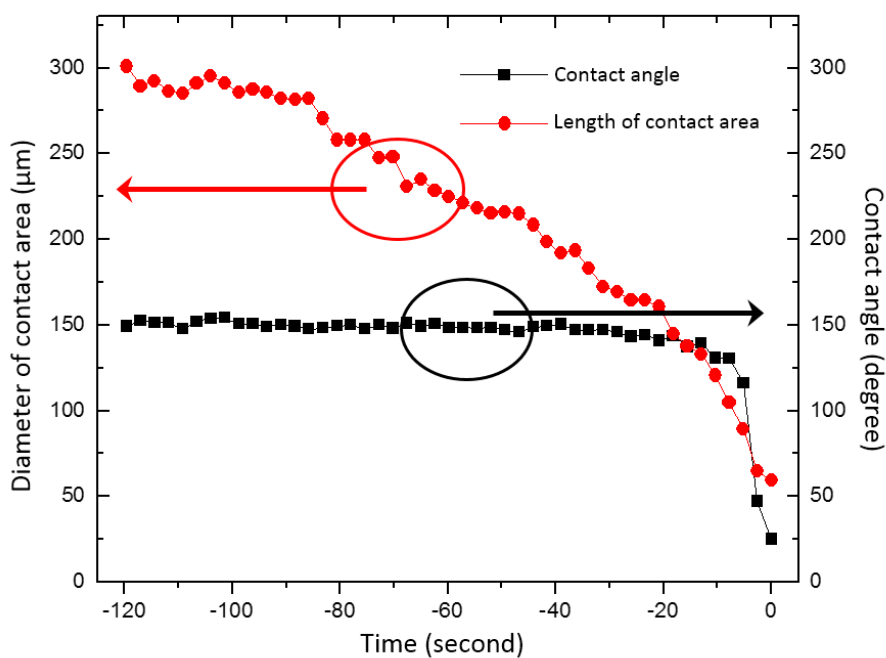

Figure 2: Droplet contact angle and diameter of contact area versus time during drying process. Time scale is chosen such that “0 seconds” represents moment at which droplet evaporation is complete.

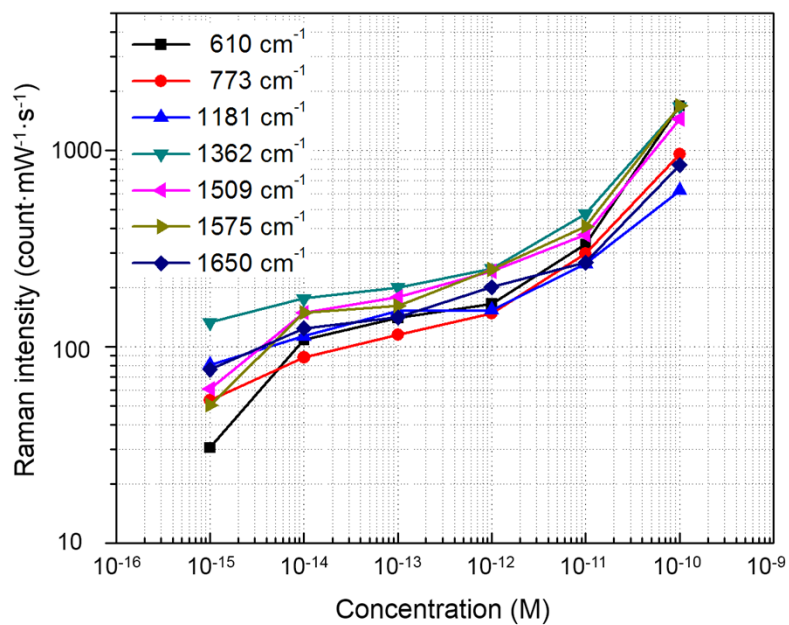

Figure 3: Intensities of different SERS lines vs R6G concentration.

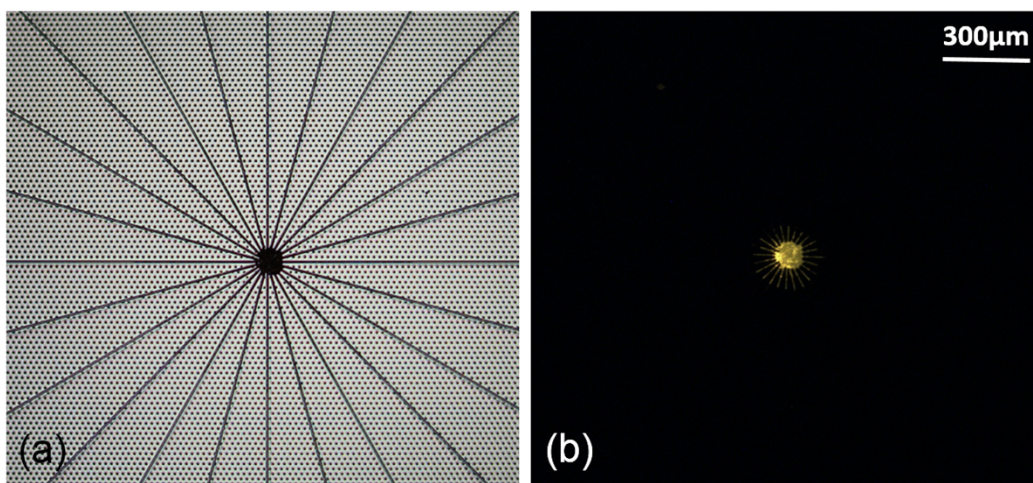

Figure 4: (a). Bright-field and (b) fluorescence microscopy images of superhydrophobic bulls-eye after gold colloid and R6G droplets have dried on it.

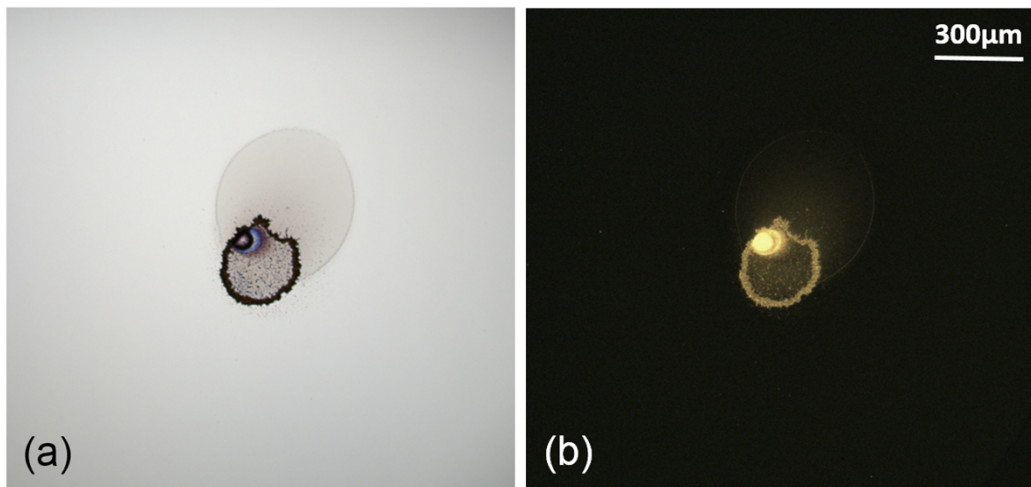

Figure 5: (a). Bright-field and (b) fluorescence microscopy images of flat Si wafer (with SAM for hydrophobicity) after gold colloid and R6G droplets have dried on it

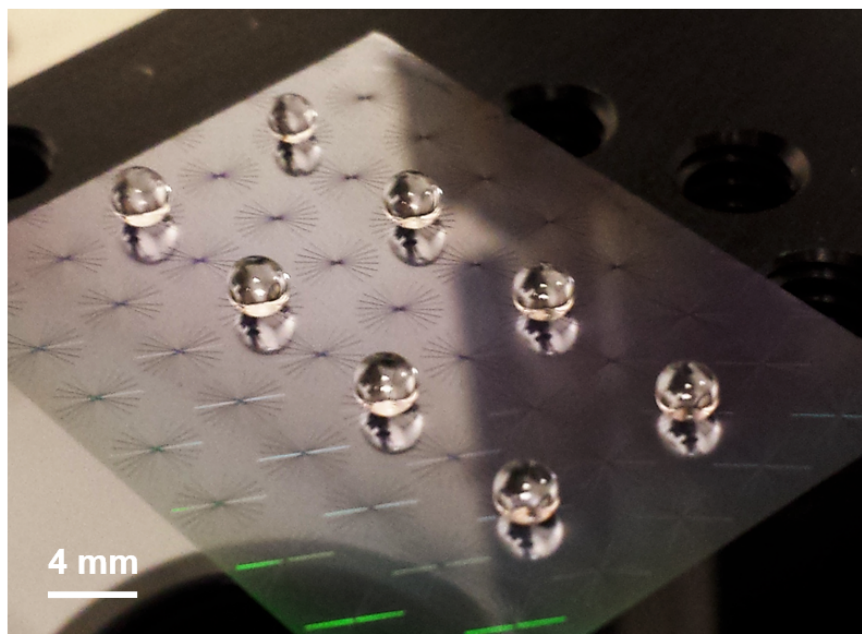

Figure 6: Array of droplets produced by hand-pipetting onto an array of bulls-eye devices.

## Supplementary Materials Movie Captions

Movie 1: Movie showing the drying of a droplet on a bulls-eye substrate. During first part of movie, a playback speed of  $20.8 \times$  real time is used. During second part of movie, playback speed is reduced to  $2.6 \times$  real time.

Movie 2: Droplet is placed on superhydrophobic bulls-eye substrate that is sitting on a mechanical tilt stage. From movie, it can be seen that droplet remains pinned to bulls-eye centre as substrate is tilted up to  $2.4^\circ$ .

Movie 3: Droplet is placed on regular superhydrophobic substrate (pillars and SAM, but no fins) that is sitting on mechanical tilt stage. From movie, it can be seen that even with a small tilting angle of  $0.98^\circ$ , droplet moves on surface.
